# Supplementary material
Source: PubMed Central journal article supplement (PMC4904288)
Supplement: supp_fj.201600252_Supplemental_Figures.pdf [file supp_fj.201600252_Supplemental_Figures.pdf]

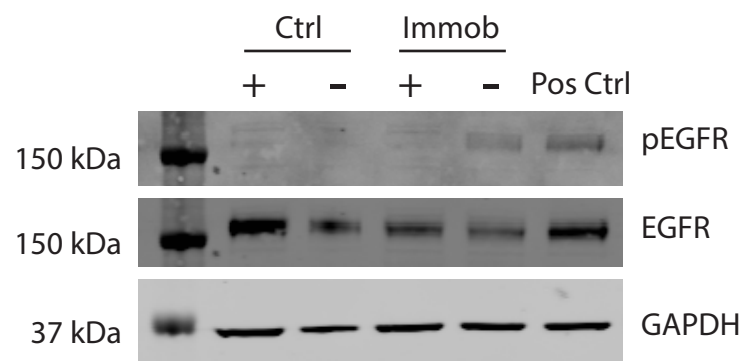

**Supplemental Figure 1.** Immunoblotting of pEGFR demonstrated that 2  $\mu$ M AG 1478 prevents EGFR phosphorylation during cell attachment in the immobilized EGF condition without substantially decreasing EGFR levels. HaCaT cells were plated at 50,000 cells/cm<sup>2</sup> in 24-well plates in DMEM supplemented with 0.5% FBS and 2  $\mu$ M AG 1478. After 12 hours, the control and immobilized EGF wells were refed with serum-free media, while the soluble EGF treatment condition received 20 ng soluble EGF in serum-free media. HaCaT cells were lysed after 15 min for validation of AG 1478 inhibition of pEGFR. The lysis buffer was composed of 50 mM  $\beta$ -glycerophosphate, pH 7.3 (Boston BioProducts, Ashland, MA), 10 mM NaPP (Boston BioProducts), 30 mM NaF (Boston BioProducts), 50 mM Tris, pH 7.5, 2% Triton X-100, 150 mM NaCl, 1 mM benzamidine (Millipore), 2 mM EGTA (Boston BioProducts), 100 mM sodium orthovanadate (Boston BioProducts), 1 mM DTT, 10  $\mu$ g/mL aprotinin (Sigma), 10  $\mu$ g/mL leupeptin (Sigma), 1  $\mu$ g/mL pepstatin (Sigma), 1  $\mu$ g/mL microcystin-LR (Sigma), and 1 mM PMSF (Sigma). Protein content of the lysate was measured by a bicinchoninic acid (BCA) assay, and 20  $\mu$ g protein per sample was separated on NuPage<sup>®</sup> Novex 4-12% Bis-Tris Protein Gels and transferred onto nitrocellulose membranes (Bio-Rad, Hercules, CA). Membranes were blocked with Odyssey blocking buffer (Li-cor Biosciences, Lincoln, NE) for 1 hour at room temperature and incubated overnight at 4°C in primary antibody diluted in Odyssey blocking buffer. Anti-pEGFR (Tyr1068, #2236, 1:500), EGFR (#2232, 1:1000), and GAPDH (#2118, 1:10000) were purchased from Cell Signaling Technology. Membranes were incubated for 1 hour with goat anti-rabbit IRDye<sup>®</sup> 680 (Li-cor Biosciences, 1:15000) to detect EGFR and GAPDH, or goat anti-mouse IRDye<sup>®</sup> 800 (Li-cor Biosciences, 1:15000) to detect pEGFR. Membranes were washed again and analyzed using the Li-cor BioScience Odyssey 9120 Infrared Imaging System (Li-cor Biosciences).

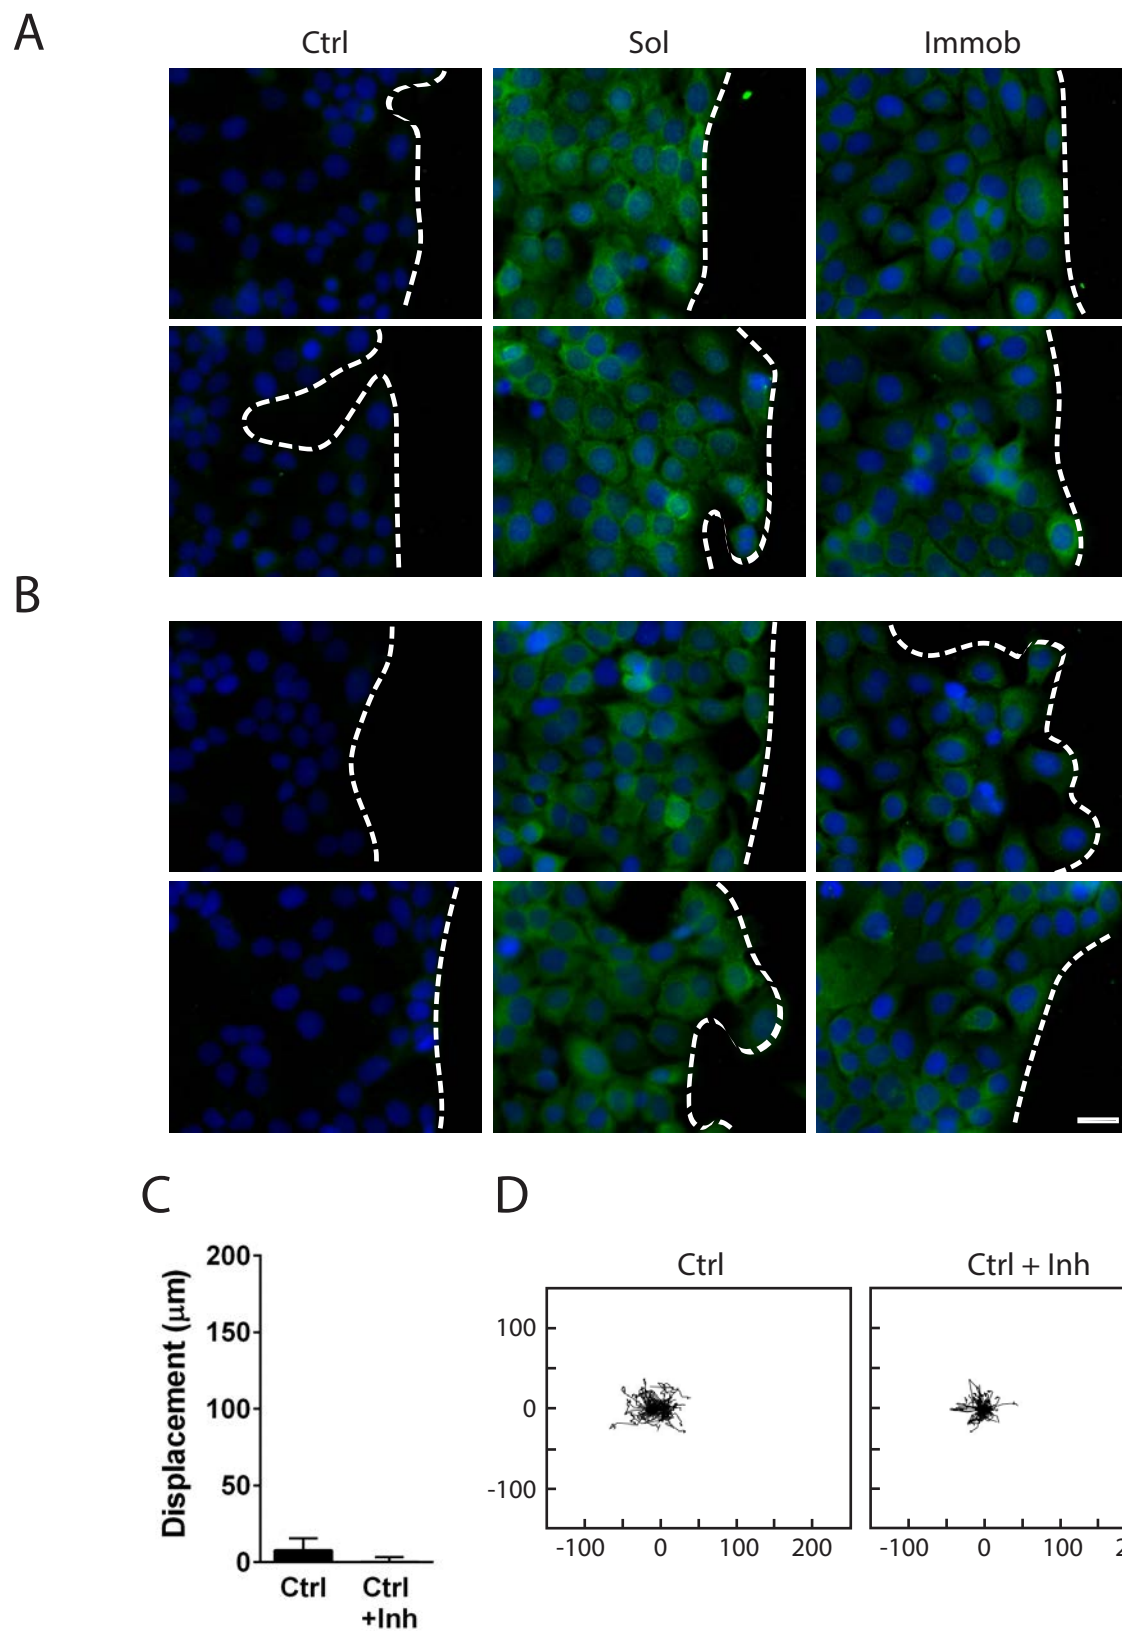

**Supplemental Figure 2.** Additional images of immunofluorescent staining for pERK at (A) 30 minutes or (B) 2 hours. Green indicates pERK and blue is DAPI nuclei stain, scale bar = 25  $\mu\text{m}$ . MEK inhibition does not impact baseline collective migration behavior, as evidenced by (C) cell sheet displacement at 8 hours and (D) windrose plots ( $\mu\text{m}$ ) of individual cell tracks.  $n = 75$ .

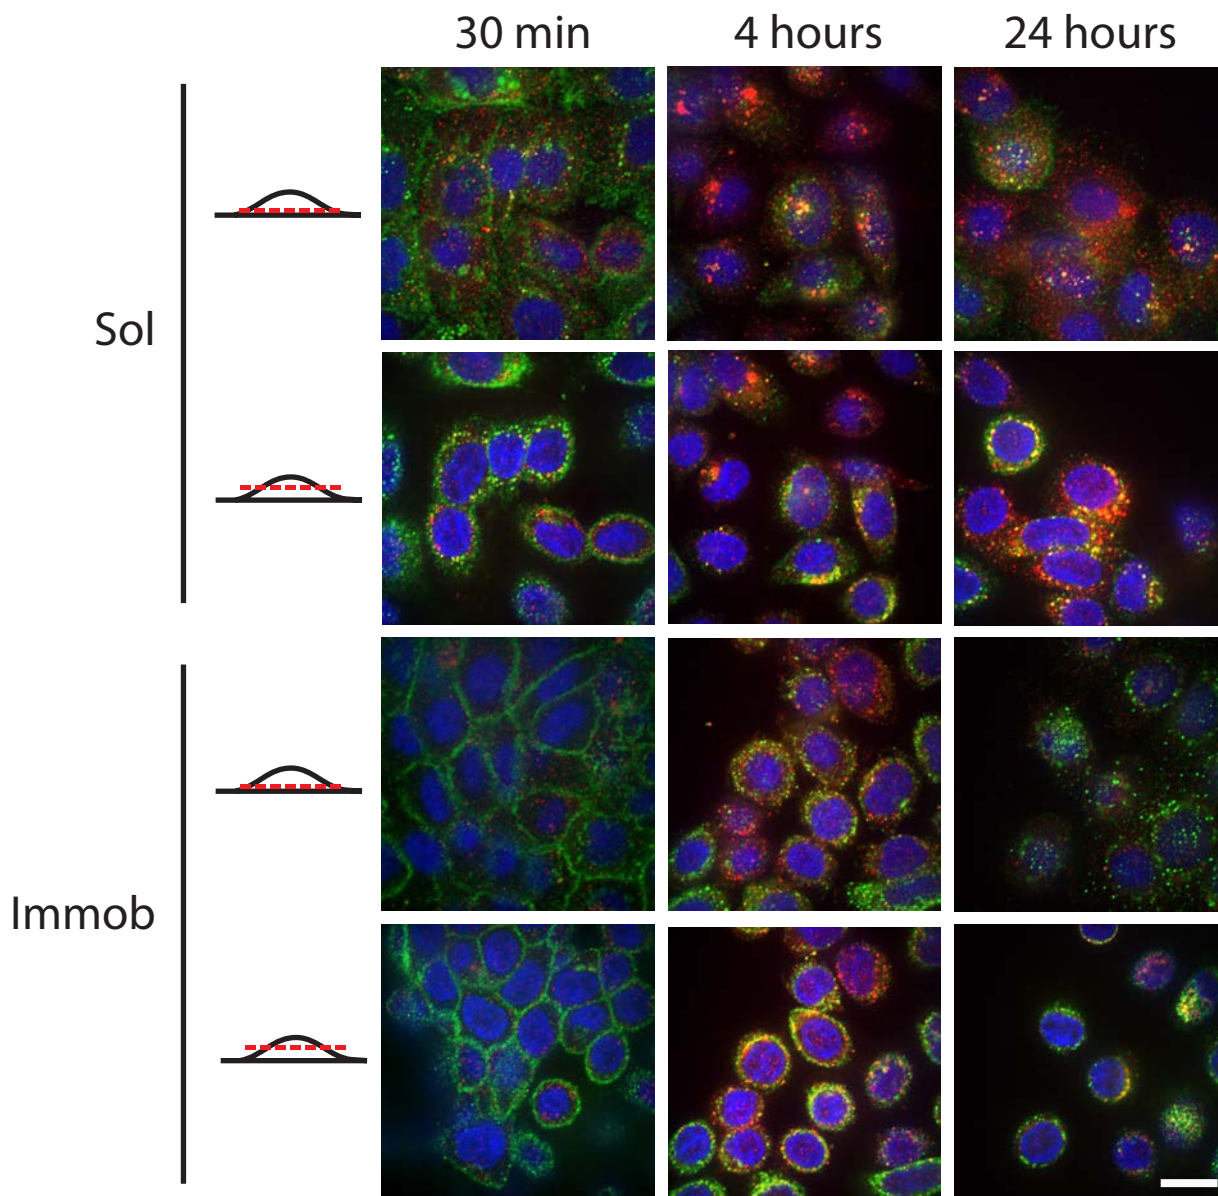

**Supplemental Figure 3.** Additional images of immunofluorescent staining for EGFR (green) and EEA1 (red). Red line indicates cellular plane for panels, scale bar =100  $\mu\text{m}$ .

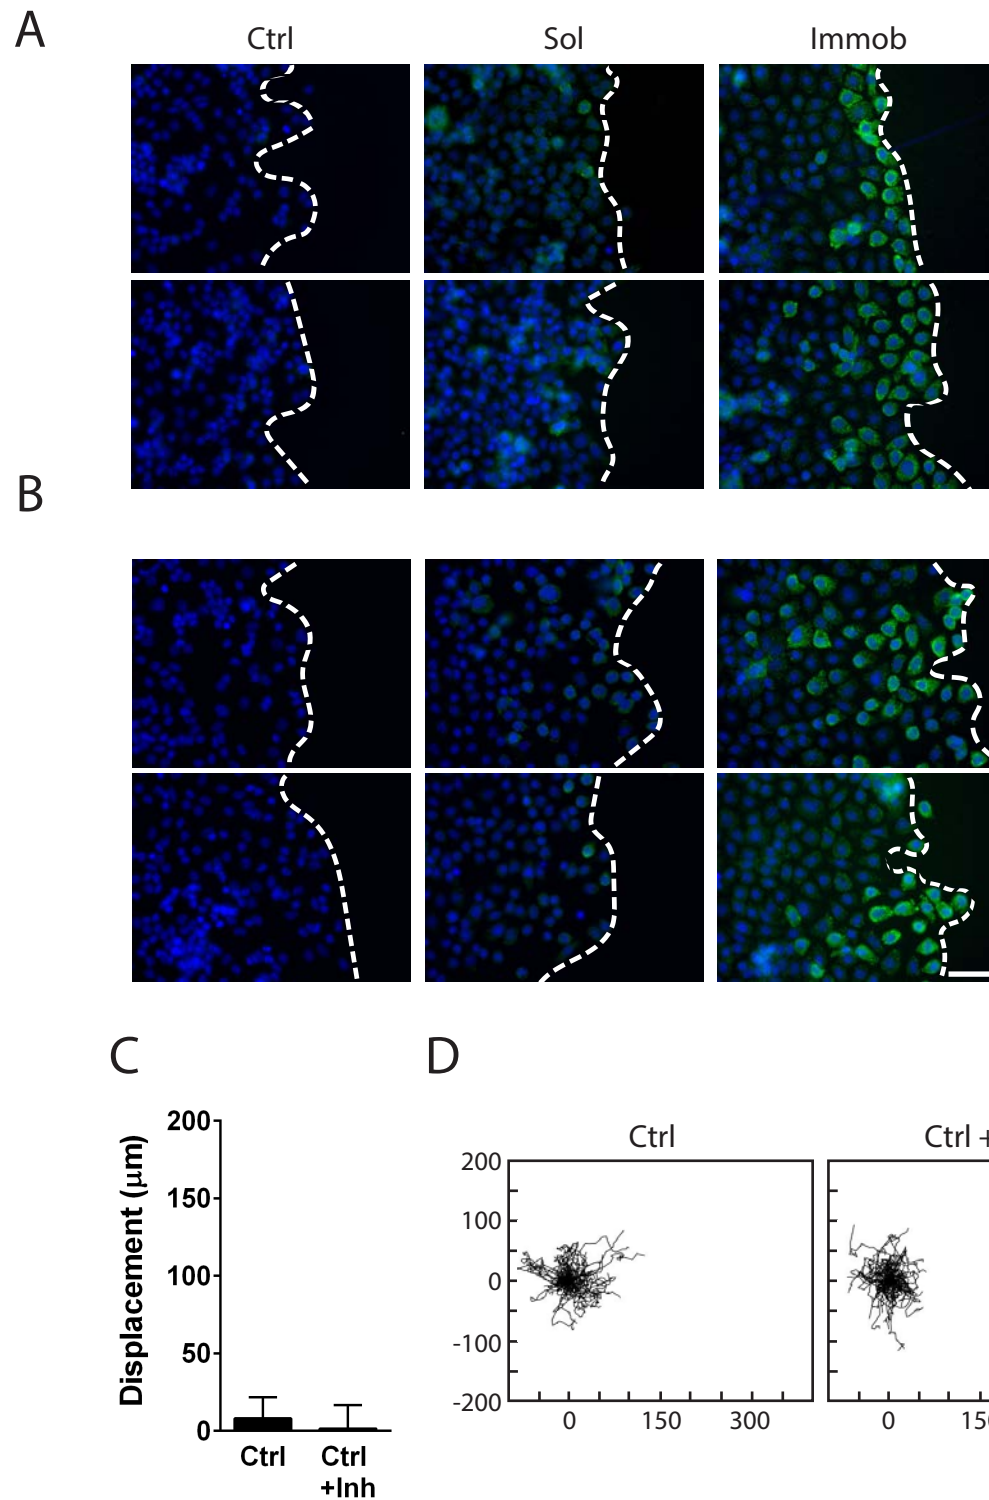

**Supplemental Figure 4.** Additional images of immunofluorescent staining for pPLC $\gamma$ 1 at (A) 30 minutes or (B) 4 hours. Green indicates pPLC $\gamma$ 1 and blue is DAPI nuclei stain, scale bar = 50  $\mu$ m. PLC $\gamma$ 1 inhibition does not impact baseline collective migration behavior, as evidenced by (C) cell sheet displacement at 8 hours and (D) windrose plots ( $\mu$ m) of individual cell tracks.  $n = 75$ .
